# Supplementary material for: Graphene quantum dots incorporated NiAl2O4 nanocomposite based molecularly imprinted electrochemical sensor for 5-hydroxymethyl furfural detection in coffee samples
Source: Royal Society of Chemistry journal article supplement (doi:10.1039/d3ay00382e), 2023-01-01
Supplement: d3ay00382e1.pdf [file d3ay00382e1.pdf]

## Supplementary Data

For

**Graphene quantum dots incorporated NiAl<sub>2</sub>O<sub>4</sub> nanocomposite based molecularly  
imprinted electrochemical sensor for 5-hydroxymethyl furfural detection in coffee  
samples**

Hatice Ebrar Turan<sup>a</sup>, Hilal Medetalibeyoglu<sup>b</sup>, İlknur Polat<sup>a</sup>, Bahar Bankoğlu Yola<sup>c</sup>, Necip  
Atar<sup>d</sup>, Mehmet Lütfi Yola<sup>a\*</sup>

<sup>a</sup>Hasan Kalyoncu University, Faculty of Health Sciences, Department of Nutrition and Dietetics, Gaziantep, Turkey

<sup>b</sup>Kafkas University, Faculty of Science and Letters, Department of Chemistry, Kars, Turkey

<sup>c</sup>Gaziantep Islam Science and Technology University, Faculty of Engineering and Natural Sciences, Department of Engineering Basic Sciences, Gaziantep, Turkey

<sup>d</sup>Pamukkale University, Faculty of Engineering, Department of Chemical Engineering, Denizli, Turkey

\* To whom correspondence should be addressed:

E-mail: [mlutfi.yola@hku.edu.tr](mailto:mlutfi.yola@hku.edu.tr)

Tel.: +903422118080 Fax: +903422118081

## ***Apparatus***

ZEISS EVO 50 SEM, JEOL 2100 TEM, Bruker-Tensor 27 FTIR spectrometer and a PHI 5000 Versa Probe type x-ray photoelectron spectrometer were used for SEM, TEM, FTIR and XPS measurements, respectively.

## ***GCE cleaning procedure***

Surface cleaning of GCE electrodes was done using solutions containing alumina. These solutions are in different diameter sizes (0.1  $\mu\text{m}$  and 0.05  $\mu\text{m}$  ) and the particles on the surface were removed by the interaction of the electrodes with these solutions, respectively. After these solutions of different sizes were dripped onto the electrodes, cleaning processes were started with the help of electrode cleaning pads (grain size 4000). After the interaction with the solutions was completed, the electrodes were sonicated twice with ultrapure water and isopropyl alcohol, respectively. Finally, it was dried at room temperature and made ready for use.

## **Linearity**

$$LOQ = 10.0 S / m$$

$$LOD = 3.3 S / m$$

S: Standard deviation of the intercept and m: Slope of the regression line

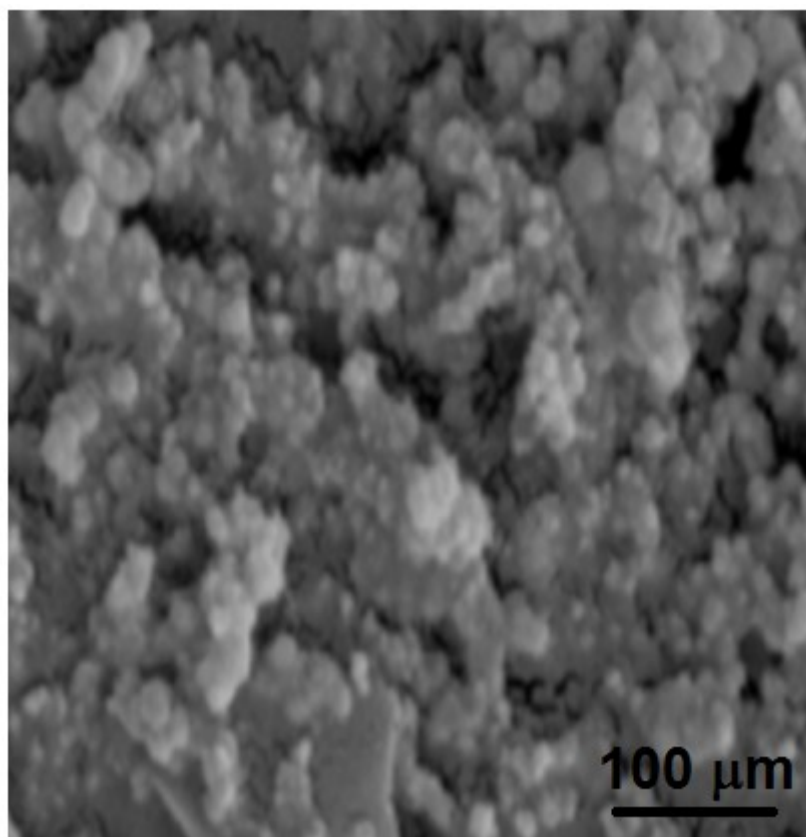

**Fig. S1.** SEM image of GQDs-NiAl<sub>2</sub>O<sub>4</sub> nanocomposite

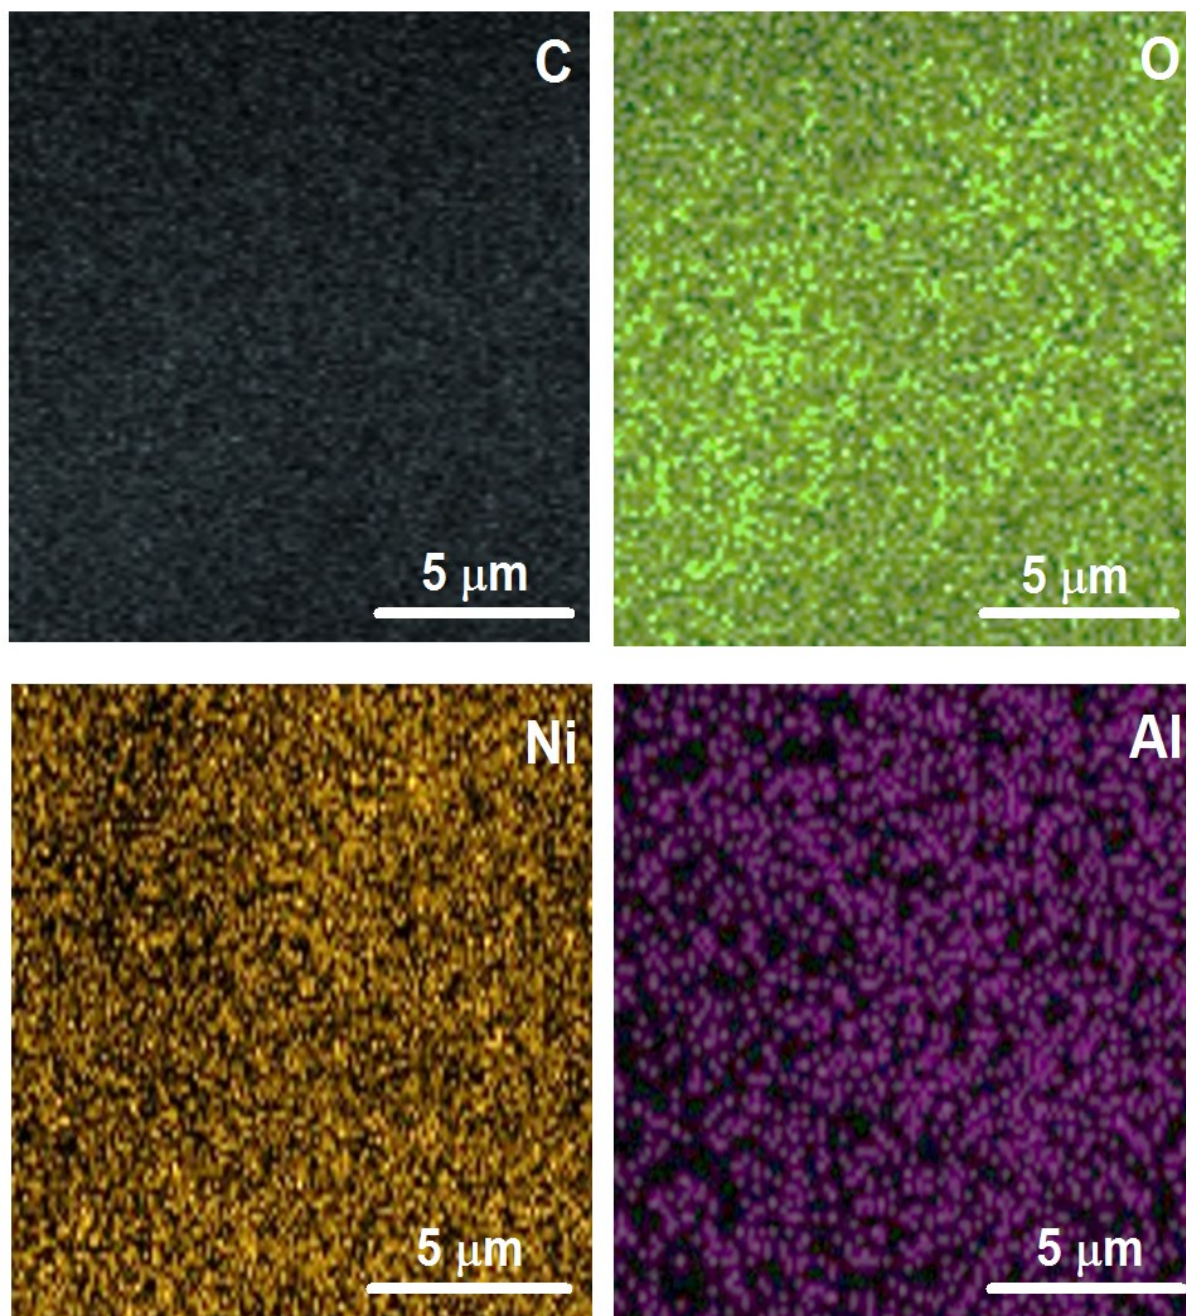

**Fig. S2.** SEM-EDX mapping of (A) nickel, (B) aluminum, (C) oxygen and (D) carbon elements on GQDs-NiAl<sub>2</sub>O<sub>4</sub> nanocomposite

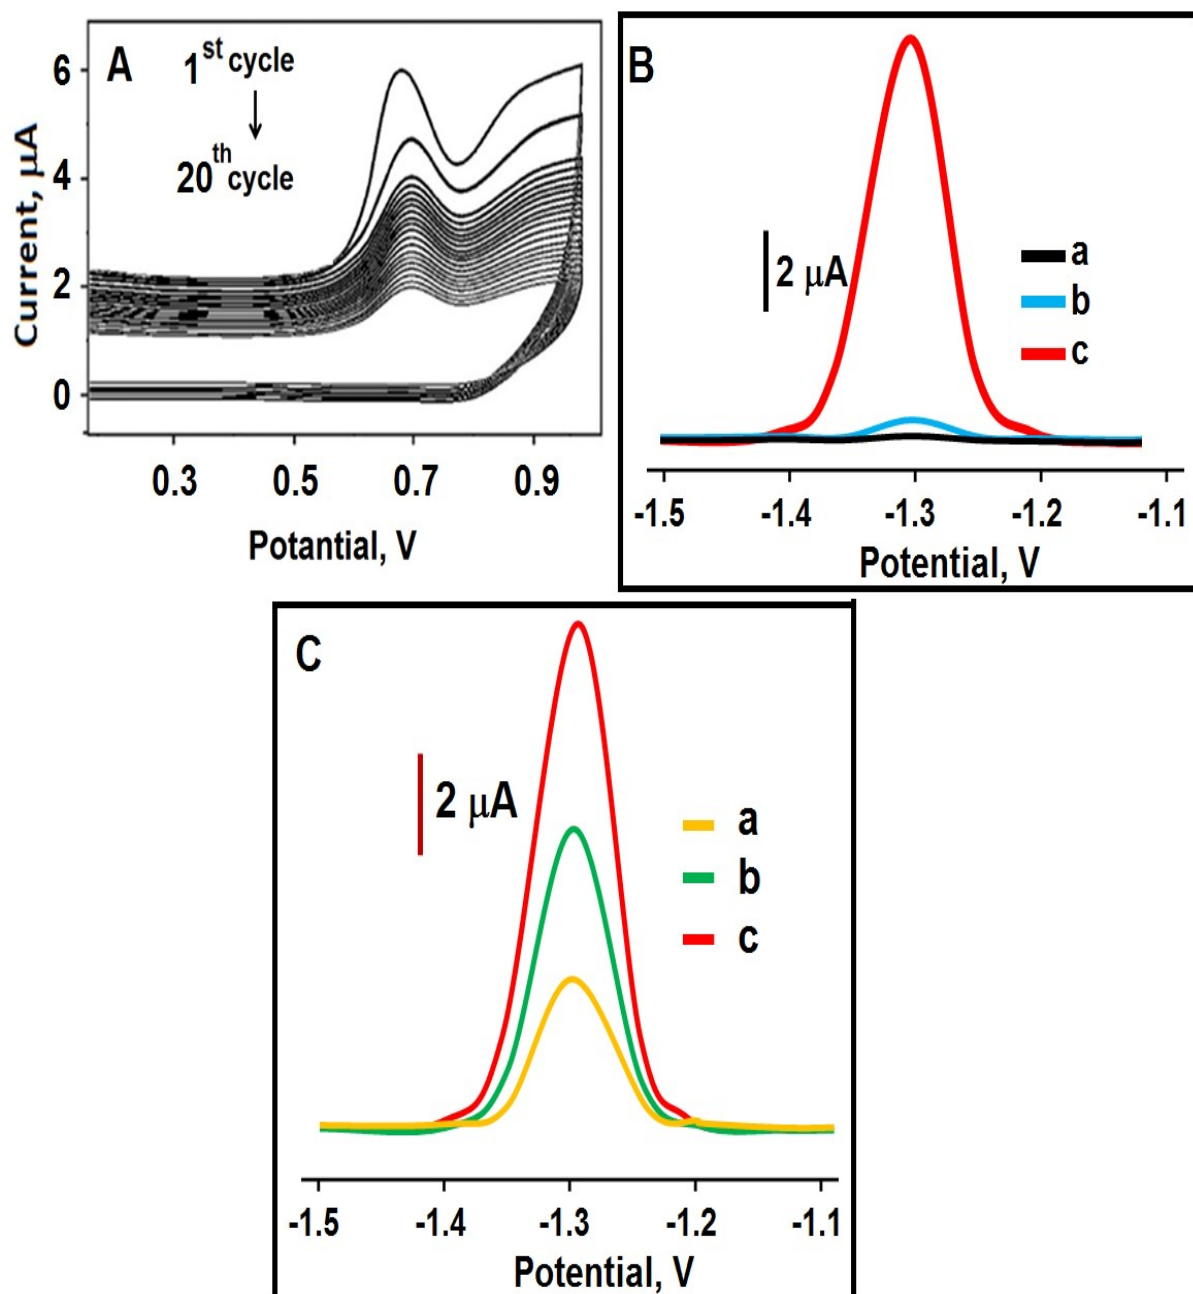

**Fig. S3.** (A) 100.0 mM Py polymerization containing 25.0 mM HMF on GQDs-NiAl<sub>2</sub>O<sub>4</sub>/GCE (Scan rate: 100 mV s<sup>-1</sup>), (B) SWVs of the prepared electrodes in this study: (a) MIP/GQDs-NiAl<sub>2</sub>O<sub>4</sub>/GCE in blank buffer solution (pH 11.0), (b) NIP/GQDs-NiAl<sub>2</sub>O<sub>4</sub>/GCE after rebinding of 5.0 ng L<sup>-1</sup> HMF in 0.1 M PBS (pH 11.0), (c) MIP/GQDs-NiAl<sub>2</sub>O<sub>4</sub>/GCE after rebinding of 5.0 ng L<sup>-1</sup> HMF in 0.1 M PBS (pH 11.0) (Parameters are frequency of 100 Hz, pulse amplitude of 25 mV, scan increment of 5 mV), (C) SWVs of different molecularly imprinting electrodes after rebinding of 5.0 ng L<sup>-1</sup> HMF in 0.1 M PBS (a) MIP/NiAl<sub>2</sub>O<sub>4</sub>/GCE, (b) MIP/GQDs/GCE, (c) MIP/GQDs-NiAl<sub>2</sub>O<sub>4</sub>/GCE (Parameters are frequency of 100 Hz, pulse amplitude of 25 mV, scan increment of 5 mV)

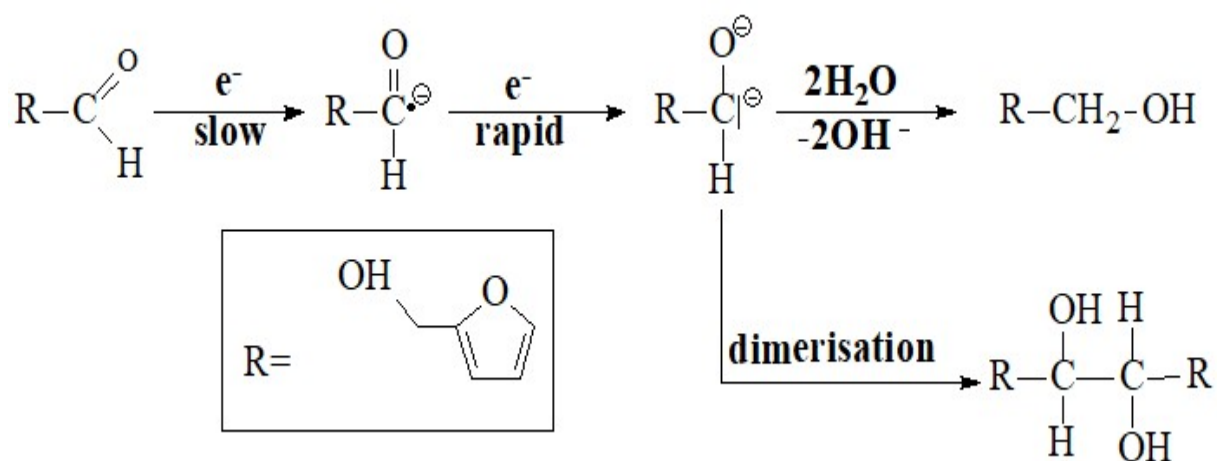

**Fig. S4.** The proposed electro-reduction mechanism for HMF at MIP/GQDs-NiAl<sub>2</sub>O<sub>4</sub>/GCE

### **3.4. Optimization studies**

#### **3.4.1. pH effect**

The pH effect is an important factor that affects the sensor signals depending on the ambient conditions. When we looked at Fig. S5A, the sensor signal values increased up to pH 11.0. Thus, 11.0 was chosen as the ideal pH.

#### **3.4.2. Mole ratio HMF to Py monomer effect**

Secondly, mole ratio HMF to Py monomer effect was investigated (Fig. S5B). In the preparation of molecularly imprinted sensors, it is necessary to carefully adjust the monomer ratio. There is a high probability of non-specific interactions in large proportions of monomer concentrations. At low monomer concentrations, the number of binding sites of the analyte molecule is low and significantly affects the sensitivity of the sensor. The highest sensor signal appears to be obtained when using 100.0 mM Py and 25.0 mM HMF.

#### **3.4.3. Desorption time effect**

It is very important to completely remove the analyte molecule from the electrode surface in the preparation of molecularly imprinted sensors. In the case of sensor preparation, the adsorption-desorption kinetics primarily affects the performance of the sensor. Consequently, a good optimization of the elution time is required. Several desorption times were tried for optimization and the most optimal signal value was obtained at 20 min (Fig. S5C).

#### **3.4.4. Scan cycle effect**

The thickness of the prepared electrode surface is very important in electrochemical sensor applications. Film thickness is an important factor that directly affects sensor performance. During the sonication process on the electrode surface with low film thickness, it is likely that the nanocomposite material will break off from the electrode surface. Therefore, molecularly imprinted electrodes with different film thickness were prepared and the highest signal was obtained in the electrode with 20<sup>th</sup> scan cycle (Fig. S5D).



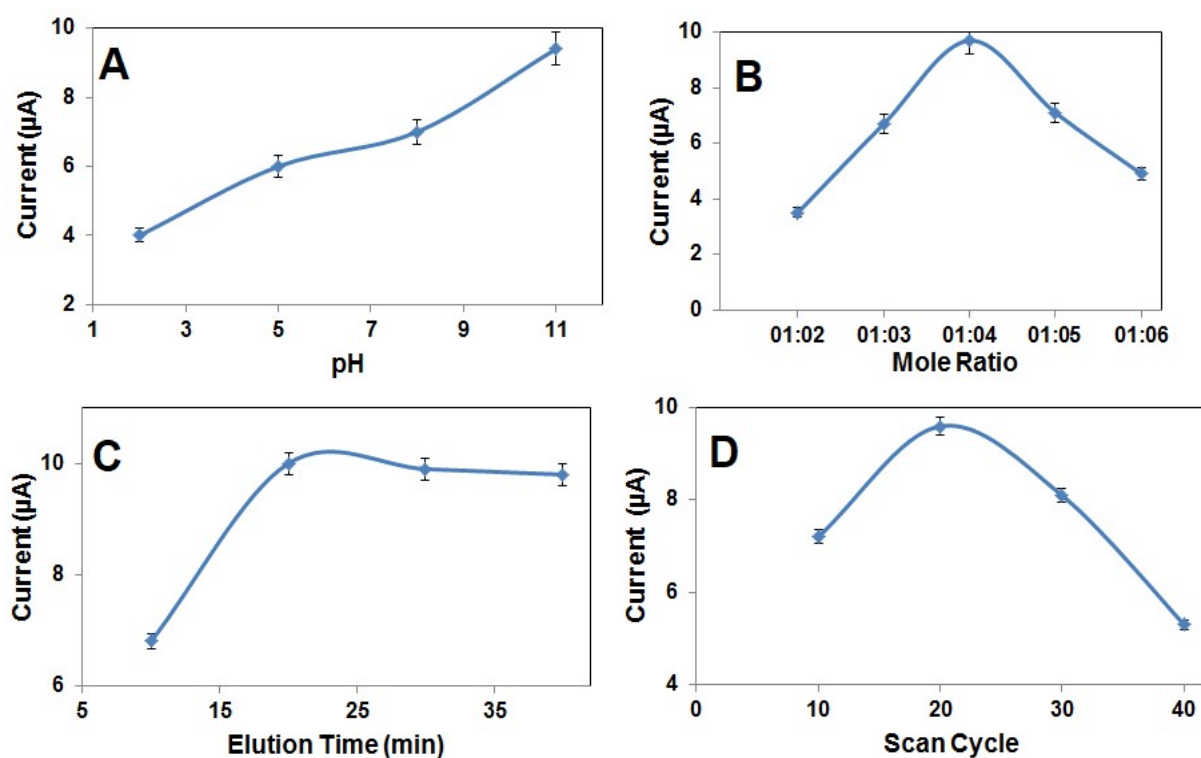

**Fig. S5.** Effect of (A) pH, (B) mole ratio, (C) desorption time, (D) scan cycle on signals of SWVs (in presence of  $5.0 \text{ ng L}^{-1}$  HMF) ( $n = 6$ )

**Table S1.** Recovery results of HMF ( $n=6$ )

| Sample | Added HMF<br>( $\text{ng L}^{-1}$ ) | Found HMF<br>( $\text{ng L}^{-1}$ ) | *Recovery<br>(%)  |
|--------|-------------------------------------|-------------------------------------|-------------------|
| Coffee | -                                   | $1.071 \pm 0.003$                   | -                 |
|        | 2.000                               | $3.073 \pm 0.006$                   | $100.07 \pm 0.01$ |
|        | 5.000                               | $6.069 \pm 0.002$                   | $99.97 \pm 0.03$  |
|        | 8.000                               | $9.070 \pm 0.008$                   | $99.99 \pm 0.01$  |

\*Recovery = Found HMF,  $\text{ng L}^{-1}$  / Real HMF,  $\text{ng L}^{-1}$



**Table S2.**  $k$  and  $k'$  values of HMF imprinted electrodes (MIP/GQDs-NiAl<sub>2</sub>O<sub>4</sub>/GCE and NIP/GQDs-NiAl<sub>2</sub>O<sub>4</sub>/GCE)

|      | MIP                    |           | NIP                    |           | <b>**k'</b> |
|------|------------------------|-----------|------------------------|-----------|-------------|
|      | $\Delta I$ ( $\mu A$ ) | <b>*k</b> | $\Delta I$ ( $\mu A$ ) | <b>*k</b> |             |
| HMF  | 10.00                  | -         | 0.50                   | -         | -           |
| 5-MT | 0.50                   | 20.00     | 0.30                   | 1.67      | 12.20       |
| FUR  | 0.40                   | 25.00     | 0.20                   | 2.50      | 10.00       |
| GLU  | 0.30                   | 33.33     | 0.15                   | 3.33      | 10.10       |
| AA   | 0.20                   | 50.00     | 0.10                   | 5.00      | 10.00       |
| MGO  | 0.10                   | 100.00    | 0.05                   | 10.00     | 10.00       |

Analyte concentrations: 5.0 ng L<sup>-1</sup> HMF, 500.0 ng L<sup>-1</sup> 5-MT, 500.0 ng L<sup>-1</sup> FUR, 500.0 ng L<sup>-1</sup> GLU, 500.0 ng L<sup>-1</sup> AA and 500.0 ng L<sup>-1</sup> MGO;  $*k = \Delta I_{\text{HMF}} / \Delta I_{\text{interfering chemical}}$  and  $**k' = k_{\text{MIP}} / k_{\text{NIP}}$

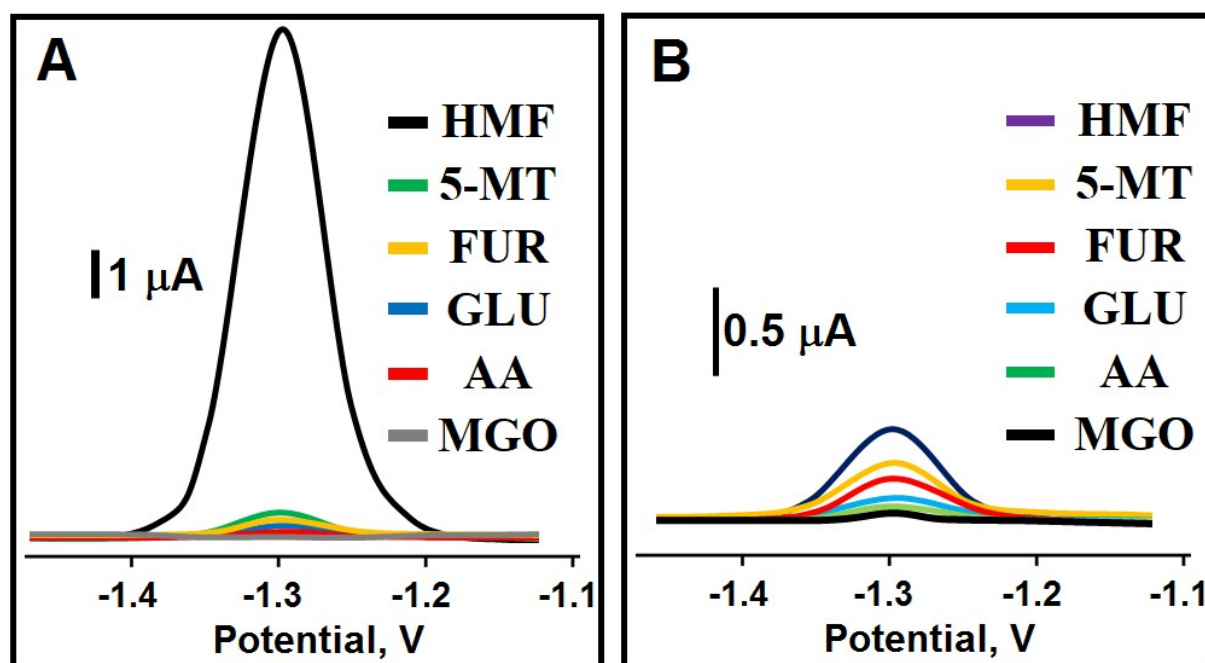

**Fig. S6.** SWVs of (A) MIP/GQDs-NiAl<sub>2</sub>O<sub>4</sub>/GCE and (B) NIP/GQDs-NiAl<sub>2</sub>O<sub>4</sub>/GCE in 5.0 ng L<sup>-1</sup> HMF, 500.0 ng L<sup>-1</sup> 5-MT, 500.0 ng L<sup>-1</sup> FUR, 500.0 ng L<sup>-1</sup> GLU, 500.0 ng L<sup>-1</sup> AA and 500.0 ng L<sup>-1</sup> MGO (Parameters are frequency of 100 Hz, pulse amplitude of 25 mV, scan increment of 5 mV)

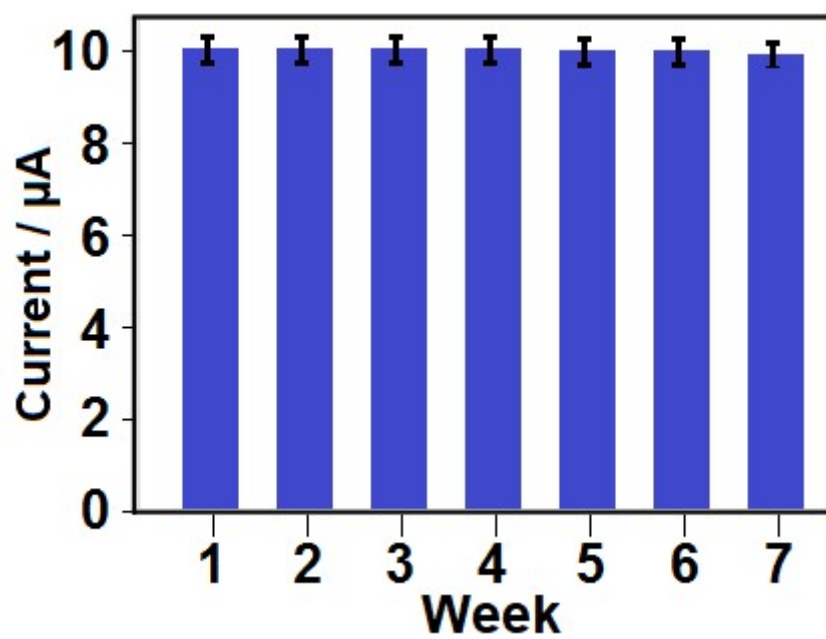

**Fig. S7.** Stability test of MIP/GQDs-NiAl<sub>2</sub>O<sub>4</sub>/GCE including 5.0 ng L<sup>-1</sup> HMF (n = 6)
